# Supplementary material for: Clinical Course from Diagnosis to Death in Patients with Well-Differentiated Thyroid Cancer
Source: MDPI journal article supplement (doi:10.3390/cancers12082323), 2020-08-18
Supplement: s1 [file s1]

# Clinical Course from Diagnosis to Death in Patients with Well-Differentiated Thyroid Cancer

Hyunju Park, Jun Park, So Young Park, Tae Hyuk Kim, Sun Wook Kim, and Jae Hoon Chung

**Table S1.** Clinicopathological characteristics of DTC patients based on time interval.

| Characteristics                                 |              | 1996-2002    | 2003-2009    | 2010-2018    | P-value |
|-------------------------------------------------|--------------|--------------|--------------|--------------|---------|
| <b>Number of Patients (Inoperable Patients)</b> |              | 27 (2)       | 36 (3)       | 16 (1)       |         |
| Mean survival (month, SD)                       |              | 74.37 (9.39) | 56.25 (5.23) | 63.19 (13.5) |         |
| Sex ( <i>n</i> , %)                             | Female       | 19 (70.4)    | 26 (72.2)    | 7 (43.8)     | 0.113   |
| Primary tumor size ( <i>n</i> , %)              | <4cm         | 19 (70.4)    | 28 (77.8)    | 12 (75.0)    | 0.799   |
|                                                 | 4cm or more  | 8 (29.6)     | 8 (22.2)     | 4 (25.0)     |         |
|                                                 | 1            | 4 (16.0)     | 4 (12.1)     | 1 (6.7)      |         |
| pT ( <i>n</i> , %)                              | 2            | 5 (20.0)     | 3 (9.1)      | 1 (6.7)      | 0.419   |
|                                                 | 3            | 11 (44.0)    | 11 (33.3)    | 8 (53.3)     |         |
|                                                 | 4            | 5 (20.0)     | 15 (45.5)    | 5 (33.3)     |         |
| pN ( <i>n</i> , %)                              | Not assessed | 1 (4.0)      | 1 (3.0)      | 1 (6.7)      | 0.251   |
|                                                 | N0           | 9 (36.0)     | 17 (51.5)    | 6 (40.0)     |         |
|                                                 | N1a          | 8 (32.0)     | 3 (9.1)      | 1 (6.7)      |         |
|                                                 | N1b          | 7 (28.0)     | 12 (36.4)    | 7 (46.7)     |         |

SD, standard deviation; *n*, number of patients.

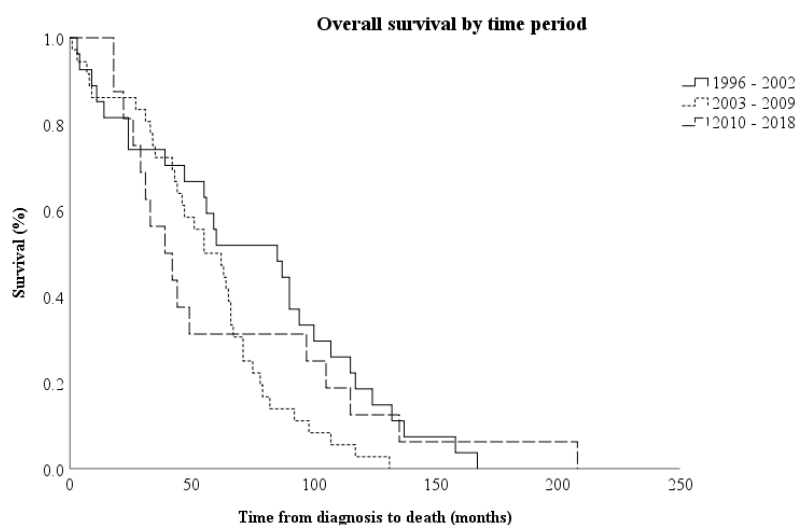

**Figure S1.** Overall survival based on time period.

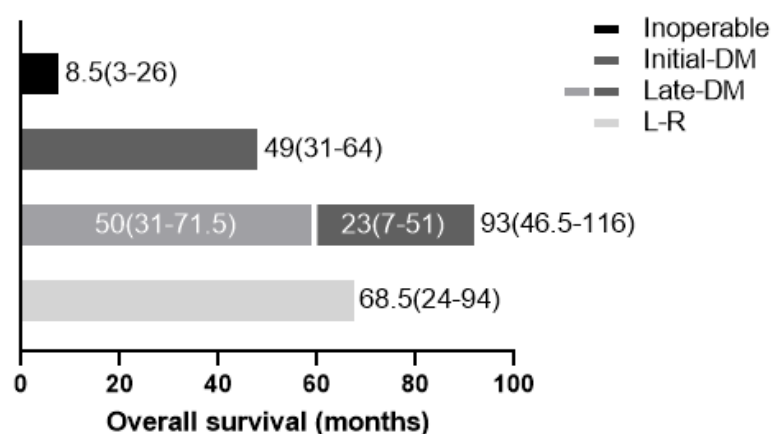

**Figure S2.** Timelines from diagnosis to death in each group. In late-DM, first column represented time from diagnosis to distant metastasis, and second column represented time from distant metastasis to death (median, interquartile range).

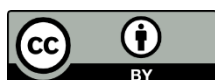

© 2020 by the authors. Licensee MDPI, Basel, Switzerland. This article is an open access article distributed under the terms and conditions of the Creative Commons Attribution (CC BY) license (<http://creativecommons.org/licenses/by/4.0/>).
